# Supplementary material for: Person-Specific Methods for Characterizing the Course and Temporal Dynamics of Concussion Symptomatology: A Pilot Study
Source: PubMed Central journal article supplement (PMC6985195; doi:10.1038/s41598-019-57220-1), 2020-01-27
Supplement: 41598_2019_57220_MOESM1_ESM.pdf [file 41598_2019_57220_MOESM1_ESM.pdf]

Person-Specific Methods for Characterizing the Course and Temporal Dynamics of Concussion  
Symptomatology: A Pilot Study

Amanda R. Rabinowitz Ph.D.<sup>1</sup> & Aaron J. Fisher Ph.D.<sup>2</sup>

<sup>1</sup>Moss Rehabilitation Research Institute, Elkins Park, PA

<sup>2</sup>Department of Psychology, University of California Berkeley, Berkeley, CA

Corresponding Author: Amanda Rabinowitz, Ph.D.

Moss Rehabilitation Research Institute

50 Township Line Rd.

Elkins Park, PA 19027

[Rabinowa@einstein.edu](mailto:Rabinowa@einstein.edu)

Aaron J. Fisher, Ph.D.

Department of Psychology

University of California Berkeley

2121 Berkeley Way

Berkeley, CA 94720

[afisher@berkeley.edu](mailto:afisher@berkeley.edu)

Supplemental Table: Neuropsychological test results

| ID        | RVLT Immediate |              | RVLT Delay   |              | TMT A        |              | TMT B        |              | WAIS PSI     |              |
|-----------|----------------|--------------|--------------|--------------|--------------|--------------|--------------|--------------|--------------|--------------|
|           | <u>acute</u>   | <u>3 mon</u> | <u>acute</u> | <u>3 mon</u> | <u>acute</u> | <u>3 mon</u> | <u>acute</u> | <u>3 mon</u> | <u>acute</u> | <u>3 mon</u> |
| <b>1</b>  | 1.75           | 2.08         | 1.04         | 1.44         | <b>29</b>    | <b>38</b>    | 42           | 51           | 105          | 120          |
| <b>2</b>  | 0.41           | 1.62         | 1.50         | 2.00         | 42           | 56           | 62           | 49           | 111          | 120          |
| <b>3</b>  | 2.33           | 2.89         | 1.00         | 2.18         | 66           | 80           | 66           | 48           | 120          | 127          |
| <b>4</b>  | -0.58          | 1.08         | -0.16        | 0.64         | <b>26</b>    | 51           | 43           | 53           | 89           | 114          |
| <b>5</b>  | 1.04           | 2.52         | 1.00         | 1.00         | 42           | 62           | 56           | 66           | 89           | 92           |
| <b>6</b>  | -0.90          | 2.87         | -0.17        | 2.00         | 47           | 74           | 61           | 79           | <b>79</b>    | 102          |
| <b>7</b>  | 0.58           | 2.25         | 0.24         | 1.44         | 43           | 65           | 51           | 46           | 102          | 114          |
| <b>8</b>  | 1.28           | 1.19         | 0.70         | 0.7          | <b>38</b>    | 42           | 54           | 59           | 100          | 108          |
| <b>9</b>  | <b>-1.56</b>   | 0.11         | -0.76        | -0.18        | 55           | 47           | 56           | 56           | 86           | 94           |
| <b>10</b> | 0.49           | 0.65         | 0.32         | 1.12         | <b>38</b>    | 51           | <b>24</b>    | 46           | <b>84</b>    | 108          |

RVLT = Rey Auditory Learning Test, TMT = Trail Making Test, WAIS PSI = Wechsler Adult Intelligence Scale 4<sup>th</sup> Edition, Processing Speed Index. RVLT is in z-score units, Trails A and Trails B in T-score units, WAIS PSI in Standard Score units. Bold scores are 1 SD below the mean on demographically adjusted published norms.
